# Supplementary material
Source: HighWire-hosted journal article supplement (http://www.ajnr.org/highwire/filestream/52439/field_highwire_adjunct_files/0/3530_tables.pdf)
Supplement: 3530_tables.pdf [file 3530_tables.pdf]

**On-Line Table 1: Gross and histologic findings in porcine CCAs after testing of alumina-tipped microcatheters with various durations of microcoil current application under x-ray or XMR imaging: magnetic microcatheter II**

| Subject No. | XMR or X-Ray Only | Range of Current to Microcoils (mA) | Duration of Current to Microcoils (min) | Work (J)                                | Saline Drip to Guide Catheter (mL/min) | Gross/Histologic Findings                                          |                                 |
|-------------|-------------------|-------------------------------------|-----------------------------------------|-----------------------------------------|----------------------------------------|--------------------------------------------------------------------|---------------------------------|
| 1           | XMR               |                                     |                                         |                                         |                                        | Left CCA: normal arterial flow                                     |                                 |
|             |                   | 300                                 | 0.5                                     | 14.8                                    | 6                                      | No thrombus, no damage to arterial wall                            |                                 |
|             |                   | 300                                 | 1.0                                     | 29.7                                    | 6                                      | No thrombus, no damage to arterial wall                            |                                 |
|             |                   | 300                                 | 5.0                                     | 148.5                                   | 6                                      | No thrombus, no damage to arterial wall                            |                                 |
|             |                   | 0                                   | 0.5                                     | 0                                       | 6                                      | No thrombus, no damage to arterial wall                            |                                 |
|             |                   | 0                                   | 1.0                                     | 0                                       | 6                                      | Mild vacuolization                                                 |                                 |
|             |                   | 0                                   | 5.0                                     | 0                                       | 6                                      | Poorly preserved slide limits histologic evaluation                |                                 |
|             |                   |                                     |                                         |                                         |                                        |                                                                    | Right CCA: zero arterial flow   |
|             |                   | 300                                 | 0.5                                     | 14.8                                    | 6                                      | No thrombus, no damage to arterial wall                            |                                 |
|             |                   | 300                                 | 5.0                                     | 148.5                                   | 6                                      | No thrombus, no damage to arterial wall                            |                                 |
| 300         | 1.0               | 29.7                                | 6                                       | No thrombus, no damage to arterial wall |                                        |                                                                    |                                 |
| 2           | XMR               |                                     |                                         |                                         |                                        | Left CCA: zero arterial flow                                       |                                 |
|             |                   | 300                                 | 1.0                                     | 29.7                                    | 0                                      | No thrombus, no damage to arterial wall                            |                                 |
|             |                   | 300                                 | 5.0                                     | 14.8                                    | 0                                      | No thrombus, no damage to arterial wall                            |                                 |
|             |                   | 600                                 | 0.5                                     | 59.4                                    | 0                                      | Poorly preserved slide limits histologic evaluation, clot in lumen |                                 |
|             |                   | 600                                 | 1.0                                     | 118.8                                   | 0                                      | No thrombus, no damage to arterial wall                            |                                 |
|             |                   | 600                                 | 2.0                                     | 237.6                                   | 0                                      | No thrombus, no damage to arterial wall                            |                                 |
|             |                   | 600                                 | 5.0                                     | 594.0                                   | 0                                      | No thrombus, no damage to arterial wall                            |                                 |
|             |                   |                                     |                                         |                                         |                                        |                                                                    | Right CCA: normal arterial flow |
|             |                   | 300                                 | 1.0                                     | 29.7                                    | 6                                      | No thrombus, no damage to arterial wall                            |                                 |
|             |                   | 300                                 | 5.0                                     | 14.8                                    | 6                                      | No thrombus, no damage to arterial wall                            |                                 |
|             |                   | 600                                 | 0.5                                     | 59.4                                    | 6                                      | No thrombus, no damage to arterial wall                            |                                 |
|             |                   | 600                                 | 1.0                                     | 118.8                                   | 6                                      | Focal media disruption                                             |                                 |
|             |                   | 600                                 | 2.0                                     | 237.6                                   | 6                                      | No thrombus, no damage to arterial wall                            |                                 |
|             |                   | 600                                 | 5.0                                     | 594.0                                   | 6                                      | No thrombus, no damage to arterial wall                            |                                 |
| *3          | X-ray only        |                                     |                                         |                                         |                                        | Left CCA: normal arterial flow                                     |                                 |
|             |                   | 600                                 | 1.0                                     | 118.8                                   | 1.2                                    | Thrombus in lumen                                                  |                                 |
|             |                   | 600                                 | 2.0                                     | 237.6                                   | 1.2                                    | Thrombus in lumen                                                  |                                 |
|             |                   | 600                                 | 5.0                                     | 594.0                                   | 1.2                                    | No thrombus, no damage to arterial wall                            |                                 |
|             |                   | 600                                 | 10.0                                    | 1188.0                                  | 1.2                                    | No thrombus, no damage to arterial wall                            |                                 |
|             |                   | 600                                 | 10.0                                    | 1188.0                                  | 1.2                                    | No thrombus, no damage to arterial wall                            |                                 |
|             |                   |                                     |                                         |                                         |                                        |                                                                    | Right CCA: zero arterial flow   |
|             |                   | 600                                 | 0.5                                     | 59.4                                    | 1.2                                    | No thrombus, no damage to arterial wall                            |                                 |
|             |                   | 600                                 | 1.0                                     | 118.8                                   | 1.2                                    | No thrombus, no damage to arterial wall                            |                                 |
|             |                   | 600                                 | 5.0                                     | 594.0                                   | 1.2                                    | No damage, thrombus in lumen                                       |                                 |
|             |                   | 600                                 | 10.0                                    | 1188.0                                  | 1.2                                    | Vacuolization of media                                             |                                 |
|             |                   | 600                                 | 10.0                                    | 1188.0                                  | 1.2                                    | Vacuolization & blood in media, wall disruption                    |                                 |
|             |                   | 700                                 | 10.0                                    | 1617.0                                  | 1.2                                    | Mild vacuolization of media                                        |                                 |

**Note:**—XMR indicates combination x-ray and MR imaging guidance.

**On-Line Table 2: Gross and histologic findings in porcine CCAs after testing of alumina-tipped microcatheters with various durations of microcoil current application under x-ray or XMR imaging: magnetic microcatheter III**

| Subject No. | XMR or X-Ray Only | Range of Current (mA) | Duration of Current (min) | Work (J)                             | Saline Drip to Guide Catheter (mL/min) | Gross/Histologic Findings                           | CC3 Staining Findings                                                 | Baseline Temp. (°C) | Max Temp. (°C) |
|-------------|-------------------|-----------------------|---------------------------|--------------------------------------|----------------------------------------|-----------------------------------------------------|-----------------------------------------------------------------------|---------------------|----------------|
| 4           | X-ray only        | 300                   | 1.0                       | 13.5                                 | 6                                      | No thrombus, no arterial wall damage                | Left CCA: zero arterial flow                                          | 34.7                | 45.1           |
|             |                   | 300                   | 1.0                       | 13.5                                 | 6                                      | No thrombus, no arterial wall damage                | NA                                                                    | 35.1                | 45.3           |
|             |                   | 300                   | 1.0                       | 13.5                                 | 6                                      | No thrombus, no arterial wall damage                | NA                                                                    | 34.6                | 41.9           |
|             |                   | 300                   | 2.0                       | 27.0                                 | 6                                      | Adhesion of inflammatory cells to intima            | Apoptotic & inflammatory cells present in media, compression of media | 34.5                | 41.1           |
|             |                   | 300                   | 5.0                       | 67.5                                 | 6                                      | Endothelial damage, intra-arterial hemorrhage       | Apoptotic & inflammatory cells present in media, compression of media | 34.6                | 41.1           |
|             |                   | 300 <sup>a</sup>      | 5.0                       | 67.5                                 | 6                                      | Endothelial damage, intra-arterial hemorrhage       | Apoptotic & inflammatory cells present in media, compression of media | 33.9                | 39.4           |
|             |                   | 150                   | 1.0                       | 3.3                                  | 6                                      | No thrombus, no arterial wall damage                | Right CCA: normal arterial flow                                       | 35.4                | 37.9           |
|             |                   | 150                   | 1.0                       | 3.3                                  | 6                                      | No thrombus, no arterial wall damage                | No apoptotic or inflammatory cells present                            | 35.5                | 37.7           |
|             |                   | 150                   | 1.0                       | 3.3                                  | 6                                      | No thrombus, no arterial wall damage                | NA                                                                    | 35.5                | 38.1           |
|             |                   | 150                   | 2.0                       | 6.75                                 | 6                                      | Endothelial damage, intra-arterial hemorrhage       | Apoptotic & inflammatory cells present in media, compression of media | 35.3                | 36.3           |
|             |                   | 150                   | 5.0                       | 16.8                                 | 6                                      | Endothelial damage, intra-arterial hemorrhage       | Apoptotic & inflammatory cells present in media, compression of media | 35.2                | 36.0           |
|             |                   | 150                   | 10.0                      | 33.7                                 | 6                                      | Endothelial damage, intra-arterial hemorrhage       | Apoptotic & inflammatory cells present in media, compression of media | 34.9                | 35.9           |
| 5           | XMR               | 300                   | 1.0                       | 13.5                                 | 6                                      | No thrombus, no arterial wall damage                | Left CCA: normal arterial flow                                        | 37.5                | 49.1           |
|             |                   | 300                   | 1.0                       | 13.5                                 | 6                                      | No thrombus, no arterial wall damage                | NA                                                                    | 37.5                | 37.4           |
|             |                   | 300                   | 1.0                       | 13.5                                 | 6                                      | Questionable damage                                 | NA                                                                    | 37.5                | 41.9           |
|             |                   | 300                   | 1.0                       | 13.5                                 | 0                                      | No thrombus, no arterial wall damage                | NA                                                                    |                     |                |
|             |                   | 300                   | 1.0                       | 13.5                                 | 0                                      | No thrombus, no arterial wall damage                | NA                                                                    |                     |                |
|             |                   | 600                   | 1.0                       | 13.5                                 | 0                                      | Irregularity in endothelial lining, no damage       | NA                                                                    | 37.6                | 42.3           |
|             |                   | 600                   | 1.0                       | 13.5                                 | 0                                      | Endothelial damage, intra-arterial hemorrhage       | NA                                                                    | 37.6                | 42.1           |
|             |                   | 600                   | 1.0                       | 13.5                                 | 0                                      | Endothelial damage, intra-arterial hemorrhage       | NA                                                                    | 37.6                | 55.8           |
|             |                   | 300                   | 1.0                       | 13.5                                 | 6                                      | Poorly preserved slide limits histologic evaluation | Right CCA: normal arterial flow                                       | 36.6                | 42.0           |
|             |                   | 300                   | 1.0                       | 13.5                                 | 6                                      | No thrombus, no arterial wall damage                | NA                                                                    | 36.6                | 41.7           |
|             |                   | 600                   | 1.0                       | 54.0                                 | 6                                      | No thrombus, no arterial wall damage                | NA                                                                    | 37.2                | 40.1           |
|             |                   | 600                   | 1.0                       | 54.0                                 | 6                                      | No thrombus, no arterial wall damage                | NA                                                                    | 37.1                | 53.7           |
| 0           | 1.0               | 0                     | 6                         | No thrombus, no arterial wall damage | NA                                     | 37.0                                                | 38.6                                                                  |                     |                |
| 0           | 1.0               | 0                     | 6                         | No thrombus, no arterial wall damage | NA                                     | 37.1                                                | 38.2                                                                  |                     |                |
| 6           | X-ray only        | 0                     | 5.0                       | 0                                    | 6                                      | No thrombus, no arterial wall damage                | Left CCA: zero arterial flow                                          | 32.6                | 32.6           |
|             |                   | 0                     | 5.0                       | 0                                    | 0                                      | No thrombus, no arterial wall damage                | NA                                                                    | 32.3                | 33.1           |
|             |                   | 0                     | 5.0                       | 0                                    | 0                                      | No thrombus, no arterial wall damage                | NA                                                                    | 32.8                | 32.9           |
|             |                   | 0                     | 5.0                       | 0                                    | 6                                      | No thrombus, no arterial wall damage                | NA                                                                    | 30.7                | 31.7           |
|             |                   | 0                     | 5.0                       | 0                                    | 0                                      | No thrombus, no arterial wall damage                | NA                                                                    | 28.5                | 31.0           |
|             |                   | 0                     | 7.0                       | 0                                    | 6                                      | No thrombus, no arterial wall damage                | Right CCA: normal arterial flow                                       | 34.1                | 34.1           |
|             |                   | 0                     | 5.0                       | 0                                    | 6                                      | No thrombus, no arterial wall damage                | NA                                                                    | 33.9                | 34.0           |
|             |                   | 0                     | 2.0                       | 0                                    | 6                                      | No thrombus, no arterial wall damage                | NA                                                                    | 33.7                | 33.8           |
|             |                   | 0                     | 5.0                       | 0                                    | 6                                      | No thrombus, no arterial wall damage                | NA                                                                    | 31.1                | 31.1           |
|             |                   | 0                     | 5.0                       | 0                                    | 0                                      | No thrombus, no arterial wall damage                | NA                                                                    | 32.7                | 33.2           |
|             |                   | 0                     | 5.0                       | 0                                    | 0                                      | No thrombus, no arterial wall damage                | NA                                                                    | 32.8                | 32.8           |
|             |                   | 0                     | 5.0                       | 0                                    | 6                                      | No thrombus, no arterial wall damage                | NA                                                                    | 32.9                | 32.9           |

**Note:**—CC3 indicates cleaved caspase 3; XMR, combination x-ray and MR imaging guidance; NA, not applicable.

<sup>a</sup>Left CCA opened to allow normal arterial flow.

**On-Line Table 3: Gross and histologic findings in porcine CCAs after testing of alumina-tipped microcatheters with various durations of microcoil current application under x-ray or XMR imaging: magnetic microcatheter IV**

| Subject No. | XMR or X-Ray Only | Range of Current (mA) | Duration of Current (min) | Work (J) | Saline Drip to Guide Catheter (mL/min) | Gross/Histologic Findings                     | CC3 Staining Findings                                       | Baseline Temp.(°C) | Maximal Temp.(°C) |      |
|-------------|-------------------|-----------------------|---------------------------|----------|----------------------------------------|-----------------------------------------------|-------------------------------------------------------------|--------------------|-------------------|------|
| 7           | X-ray only        | 600                   | 1.0                       | 54.0     | 6                                      | No thrombus, no arterial wall damage          | NA                                                          | 35.2               | 72.6              |      |
|             |                   | 600                   | 1.0                       | 54.0     | 6                                      | No thrombus, no arterial wall damage          | NA                                                          | 35.2               | 51.8              |      |
|             |                   | 600                   | 1.0                       | 54.0     | 6                                      | No thrombus, no arterial wall damage          | NA                                                          | 34.5               | 51.7              |      |
|             |                   | 600                   | 2.0                       | 108.0    | 6                                      | No thrombus, no arterial wall damage          | NA                                                          | 34.2               | 52.9              |      |
|             |                   | 600                   | 2.0                       | 108.0    | 6                                      | Endothelial & smooth muscle damage            | Infiltration of inflammatory cells, apoptotic cells present | 34.6               | 52.4              |      |
|             |                   | 600                   | 2.0                       | 108.0    | 6                                      | Endothelial damage                            | Infiltration of inflammatory cells, apoptotic cells present | 34.0               | 52.0              |      |
|             |                   | 600                   | 5.0                       | 270.0    | 6                                      | No thrombus, no arterial wall damage          | NA                                                          | 34.2               | 53.8              |      |
|             |                   | 300                   | 1.0                       | 13.5     | 6                                      | No thrombus, no arterial wall damage          | Left CCA: normal arterial flow                              | NA                 | 41.0              | 45.6 |
|             |                   | 300                   | 1.0                       | 13.5     | 6                                      | No thrombus, no arterial wall damage          | No thrombus, no arterial wall damage                        | NA                 | 35.4              | 37.9 |
|             |                   | 300                   | 1.0                       | 13.5     | 6                                      | No thrombus, no arterial wall damage          | No thrombus, no arterial wall damage                        | NA                 | 36.0              | 42.0 |
|             |                   | 300                   | 1.0                       | 13.5     | 6                                      | No thrombus, no arterial wall damage          | No thrombus, no arterial wall damage                        | NA                 | 35.6              | 39.6 |
|             |                   | 300                   | 1.0                       | 13.5     | 6                                      | No thrombus, no arterial wall damage          | No thrombus, no arterial wall damage                        | NA                 | 35.4              | 40.6 |
|             |                   | 300                   | 1.0                       | 13.5     | 6                                      | No thrombus, no arterial wall damage          | No thrombus, no arterial wall damage                        | NA                 | 35.3              | 39.8 |
|             |                   | 300                   | 1.0                       | 13.5     | 6                                      | No thrombus, no arterial wall damage          | No thrombus, no arterial wall damage                        | NA                 | 35.3              | 39.3 |
| 8           | XMR               | 600                   | 1.0                       | 54.0     | 0.85                                   | No thrombus, no arterial wall damage          | NA                                                          | 35.0               | 41.4              |      |
|             |                   | 600                   | 1.0                       | 54.0     | 0.85                                   | No thrombus, no arterial wall damage          | NA                                                          | 35.0               | 48.7              |      |
|             |                   | 600                   | 1.0                       | 54.0     | 0.85                                   | Intra-arterial hemorrhage, endothelial damage | Clear apoptosis, infiltration of inflammatory cells         | 35.4               | 49.8              |      |
|             |                   | 600                   | 2.0                       | 108.0    | 0.85                                   | No thrombus, no arterial wall damage          | NA                                                          | 35.8               | 50.7              |      |
|             |                   | 600                   | 2.0                       | 108.0    | 0.85                                   | Poorly preserved slide, clear vascular damage | NA                                                          | 35.6               | 51.4              |      |
|             |                   | 600                   | 2.0                       | 108.0    | 0.85                                   | Endothelial & smooth muscle damage            | NA                                                          | 35.8               | 52.1              |      |
|             |                   | 600                   | 5.0                       | 270.0    | 0.85                                   | Intra-arterial hemorrhage, endothelial damage | Clear apoptosis, infiltration of inflammatory cells         | 36.0               | 51.6              |      |
|             |                   | 300                   | 1.0                       | 13.5     | 0.85                                   | No thrombus, no arterial wall damage          | Left CCA: normal arterial flow                              | NA                 | 35.6              | 38.3 |
|             |                   | 300                   | 1.0                       | 13.5     | 0.85                                   | No thrombus, no arterial wall damage          | No thrombus, no arterial wall damage                        | NA                 | 35.2              | 41.4 |
|             |                   | 300                   | 1.0                       | 13.5     | 0.85                                   | No thrombus, no arterial wall damage          | No thrombus, no arterial wall damage                        | NA                 | 35.2              | 38.6 |
|             |                   | 300                   | 1.0                       | 13.5     | 0.85                                   | No thrombus, no arterial wall damage          | NA                                                          | 32.5               | 37.4              |      |
|             |                   | 300                   | 1.0                       | 13.5     | 0.85                                   | No thrombus, no arterial wall damage          | NA                                                          | 36.4               | 36.4              |      |
|             |                   | 300                   | 1.0                       | 13.5     | 0.85                                   | No thrombus, no arterial wall damage          | NA                                                          | 35.4               | 38.7              |      |
|             |                   | 300                   | 1.0                       | 13.5     | 0.85                                   | No thrombus, no arterial wall damage          | NA                                                          | 35.3               | 38.7              |      |

**Note:**—XMR indicates combination x-ray and MR imaging guidance; NA, not applicable.
